# Supplementary material
Source: publisher figshare collection journal article supplement (https://tandf.figshare.com/ndownloader/files/18025256)
Supplement: Supplementary file 1 [file 18025256]

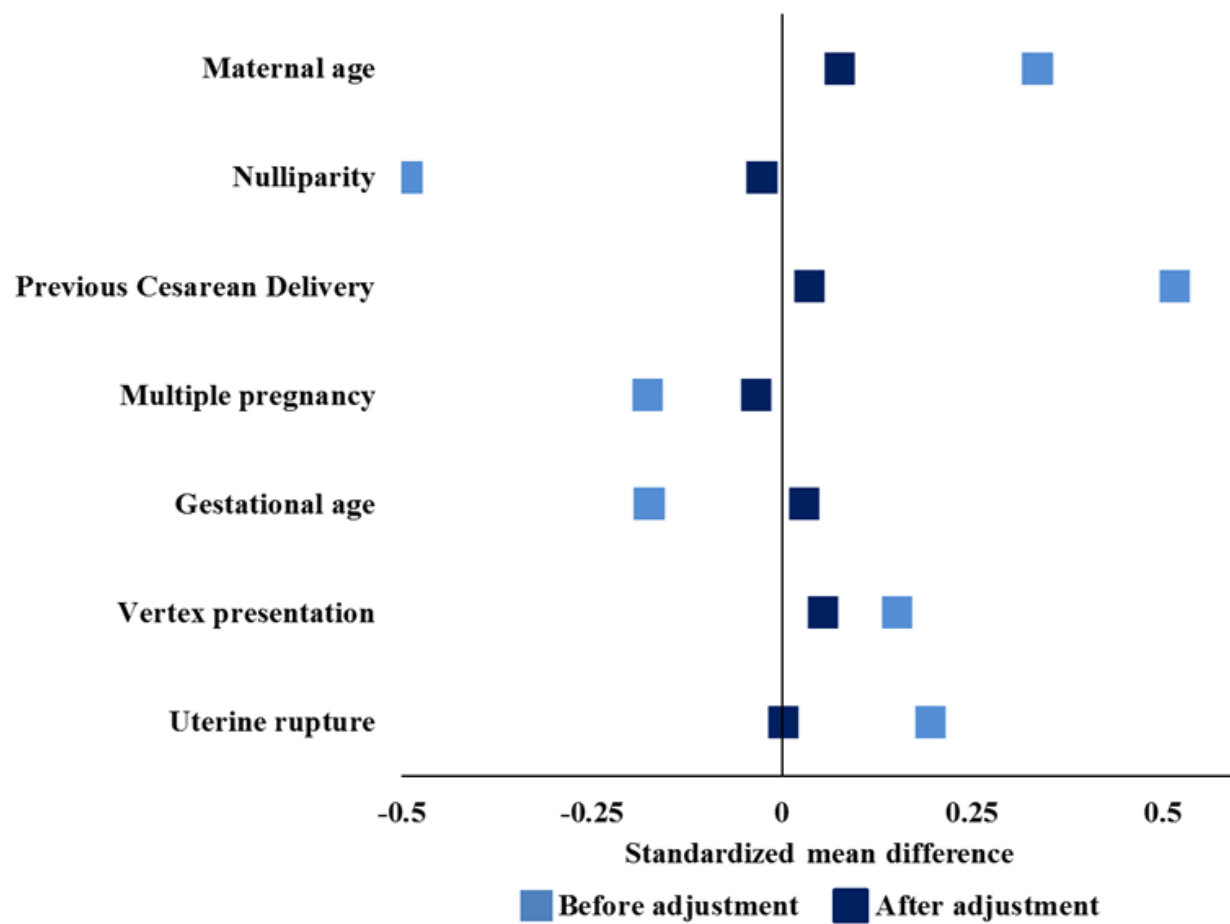

Supplementary Figure 1: Standardized mean differences before and after inverse probability treatment weighting (IPTW) adjustment.
